# Supplementary material for: Characterization and genetic diversity of Helicobacter pylori type IV secretion system components CagI and CagN and their association with clinical outcomes among Iranian patients
Source: Research Square preprint supplement (doi:10.21203/rs.3.rs-64096/v2), 2020-11-17
Supplement: Supplementary file 1 [file c4aa7458bcb3cf92e87bc1f0.docx]

**Table S1.** Oligonucleotide sequences used for amplification of the *H. pylori* virulencegenes of interest.

| **Target gene** | **Primer designation** | **Oligonucleotide sequence (5΄-3΄)** | **Annealing temperature (°C)** | **PCR product (bp)** | **Reference** |
| --- | --- | --- | --- | --- | --- |
| 16S rRNA | C97-20  H3A-20 | GGCTATGACGGGTATCCGGC  GCCGTGCAGCACCTGTTTTC | 58 | 764 | [38] |
| *glmM* | GlmM2-F  GlmM1-R | GGATAAGCTTTTAGGGGTGTTAGGGG  GCTTACTTTCTAACACTAACGCGC | 56 | 296 | [38] |
| *cagL* | cagL-B4  cagL-B5 | GCAGAATTCATAACAAGCGGCTTAAAG  ATTAGAATTCATAGCCTATCGTCTCAG | 60 | 695 | [38] |
| *cagA* | 93089  93261 | AATACACCAACGCCTCCAAG  TTGTTGCCGCTTTTGCTCTC | 57 | 400 | [38] |
| *vacA* s1/s2 | VA1-F  VA1-R | ATGGAAATACAACAAACACAC  CTGCTTGAATGCGCCAAAC | 57 | 259/286 | [38] |
| *vacA* m1/m2 | VAG-F  VAG-R | CAATCTGTCCAATCAAGCGAG  GCGTCAAAATAATTCCAAGG | 57 | 570/645 | [38] |
| *babA2* | bab7-F  bab7-R | CCAAACGAAACAAAAAGCGT  GCTTGTGTAAAAGCCGTCGT | 52 | 271 | [39] |
| *sabA* | F1-HP726-jhp663  R1-HP725-jhp662 | TTTTTGTCAGCTACGCGTTC  ACCGAAGTGATAACGGCTTG | 56 | 487 | [39] |
| *dupA* | DupA-F  DupA-R | ATTCACGCCTAAGACCTCA  CTGAGAAGCCTTATTATCTTGTTGG | 55 | 581 | [39] |

**Table S2.** Demographic data and clinical characteristics of patients colonized with *H. pylori* strains (*n*=70) in this study.

| **No.** | **Strains** | **Clinical status** | **Gender** | **Age (years)** | ***cagI* GenBank no.a** | ***cagN* GenBank no.** |
| --- | --- | --- | --- | --- | --- | --- |
| 1 | HC3 | PUD | Male | 46 | Negativeb | NA |
| 2 | OC4 | PUD | Female | 58 | MG573078 | MG559675 |
| 3 | OC30 | NUD | Male | 56 | MG573079 | MG559676 |
| 4 | HC114 | PUD | Female | 49 | Negative | NA |
| 5 | OC149 | NUD | Female | 31 | MG573080 | NA |
| 6 | HC168 | PUD | Male | 49 | NAc | NA |
| 7 | HC175 | NUD | Female | 27 | Negative | NA |
| 8 | OC175 | NUD | Female | 30 | MG573081 | MG559677 |
| 9 | OC179 | GC | Female | 63 | NA | MG559678 |
| 10 | OC180 | IM | Female | 39 | Negative | NA |
| 11 | OC217 | NUD | Female | 42 | Negative | Negative |
| 12 | OC235 | PUD | Female | 75 | NA | NA |
| 13 | OC245 | IM | Male | 48 | NA | Negative |
| 14 | OC250 | PUD | Male | 57 | NA | NA |
| 15 | OC485 | NUD | Male | 54 | NA | MG559679 |
| 16 | OC494 | NUD | Female | 42 | MG573082 | MG559680 |
| 17 | OC505 | NUD | Female | 39 | NA | NA |
| 18 | OC557 | PUD | Female | 50 | Negative | Negative |
| 19 | OC562 | NUD | Female | 43 | MG573083 | NA |
| 20 | OC571 | NUD | Female | 49 | Negative | MG559681 |
| 21 | OC573 | NUD | Female | 36 | MG573084 | MG559682 |
| 22 | OC576 | NUD | Female | 42 | MG573085 | MG559683 |
| 23 | OC606 | PUD | Male | 60 | NA | MG559684 |
| 24 | OC639 | PUD | Male | 25 | Negative | MG559685 |
| 25 | OC656 | PUD | Male | 41 | NA | MG559686 |
| 26 | OC658 | NUD | Female | 33 | NA | MG559687 |
| 27 | OC661 | NUD | Male | 33 | MG573086 | MG559688 |
| 28 | OC688 | IM | Female | 42 | MG573087 | MG559689 |
| 29 | OC722 | NUD | Female | 43 | MG573088 | MG559718 |
| 30 | OC723 | NUD | Male | 47 | NA | MG559690 |
| 31 | OC728 | NUD | Female | 23 | NA | MG559691 |
| 32 | OC731 | NUD | Female | 24 | MG573089 | NA |
| 33 | OC734 | NUD | Male | 50 | MG573090 | MG559692 |
| 34 | OC743 | NUD | Male | 60 | Negative | MG559693 |
| 35 | OC749 | NUD | Male | 70 | NA | MG559694 |
| 36 | OC751 | NUD | Female | 44 | MG573091 | MG559695 |
| 37 | OC770 | NUD | Female | 73 | MG573092 | MG559696 |
| 38 | OC775 | PUD | Female | 39 | NA | MG559697 |
| 39 | OC776 | NUD | Male | 34 | MG573093 | NA |
| 40 | OC785 | NUD | Male | 60 | Negative | MG559719 |
| 41 | OC790 | NUD | Male | 26 | NA | MG559720 |
| 42 | OC793 | NUD | Female | 41 | MG573094 | MG559698 |
| 43 | OC796 | PUD | Female | 51 | MG573095 | MG559699 |
| 44 | OC797 | IM | Female | 28 | NA | NA |
| 45 | OC803 | NUD | Male | 52 | NA | MG559700 |
| 46 | OC805 | NUD | Female | 48 | MG573096 | MG559701 |
| 47 | OC808 | NUD | Female | 65 | NA | MG559702 |
| 48 | OC810 | NUD | Female | 53 | NA | NA |
| 49 | OC814 | PUD | Female | 25 | NA | MG559703 |
| 50 | OC815 | NUD | Female | 34 | MG573105 | Negative |
| 51 | OC816 | NUD | Male | 14 | NA | MG559704 |
| 52 | OC819 | PUD | Female | 32 | NA | MG559705 |
| 53 | OC824 | PUD | Female | 43 | MG573097 | NA |
| 54 | OC840 | IM | Male | 54 | NA | MG559706 |
| 55 | OC846 | NUD | Female | 52 | MG573098 | MG559707 |
| 56 | OC852 | IM | Male | 45 | NA | MG559708 |
| 57 | OC854 | NUD | Female | 71 | MG573099 | Negative |
| 58 | OC884 | NUD | Female | 60 | Negative | Negative |
| 59 | OC897 | PUD | Female | 60 | Negative | MG559709 |
| 60 | OC912 | PUD | Female | 64 | MG573100 | MG559710 |
| 61 | OC913 | PUD | Male | 42 | MG573106 | NA |
| 62 | OC937 | NUD | Female | 48 | MG573101 | MG559711 |
| 63 | OC939 | PUD | Male | 54 | MG573102 | MG559712 |
| 64 | OC975 | IM | Female | 31 | MG573107 | MG559713 |
| 65 | OC978 | PUD | Female | 45 | MG573103 | MG559714 |
| 66 | OC983 | PUD | Female | 55 | Negative | NA |
| 67 | OC996 | PUD | Female | 52 | MG573104 | MG559715 |
| 68 | OC1021 | PUD | Female | 50 | NA | MG559716 |
| 69 | OC1028 | NUD | Female | 27 | Negative | MG559717 |
| 70 | OC1031 | NUD | Female | 52 | NA | NA |

GC, gastric cancer; IM, intestinal metaplasia; NUD, nonulcer dyspepsia; PUD, peptic ulcer disease; NA, not assigned.

aThe accession numbers are deposited in GenBank database for *cagI* and *cagN* gene sequences of the *H. pylori* strains in this study.

bThe *cagI*-negative or *cagN*-negative *H. pylori* strains.

cThe *cagI*-positive or *cagN*-positive *H. pylori* strains that either were not sequenced or sequenced unsuccessfully.


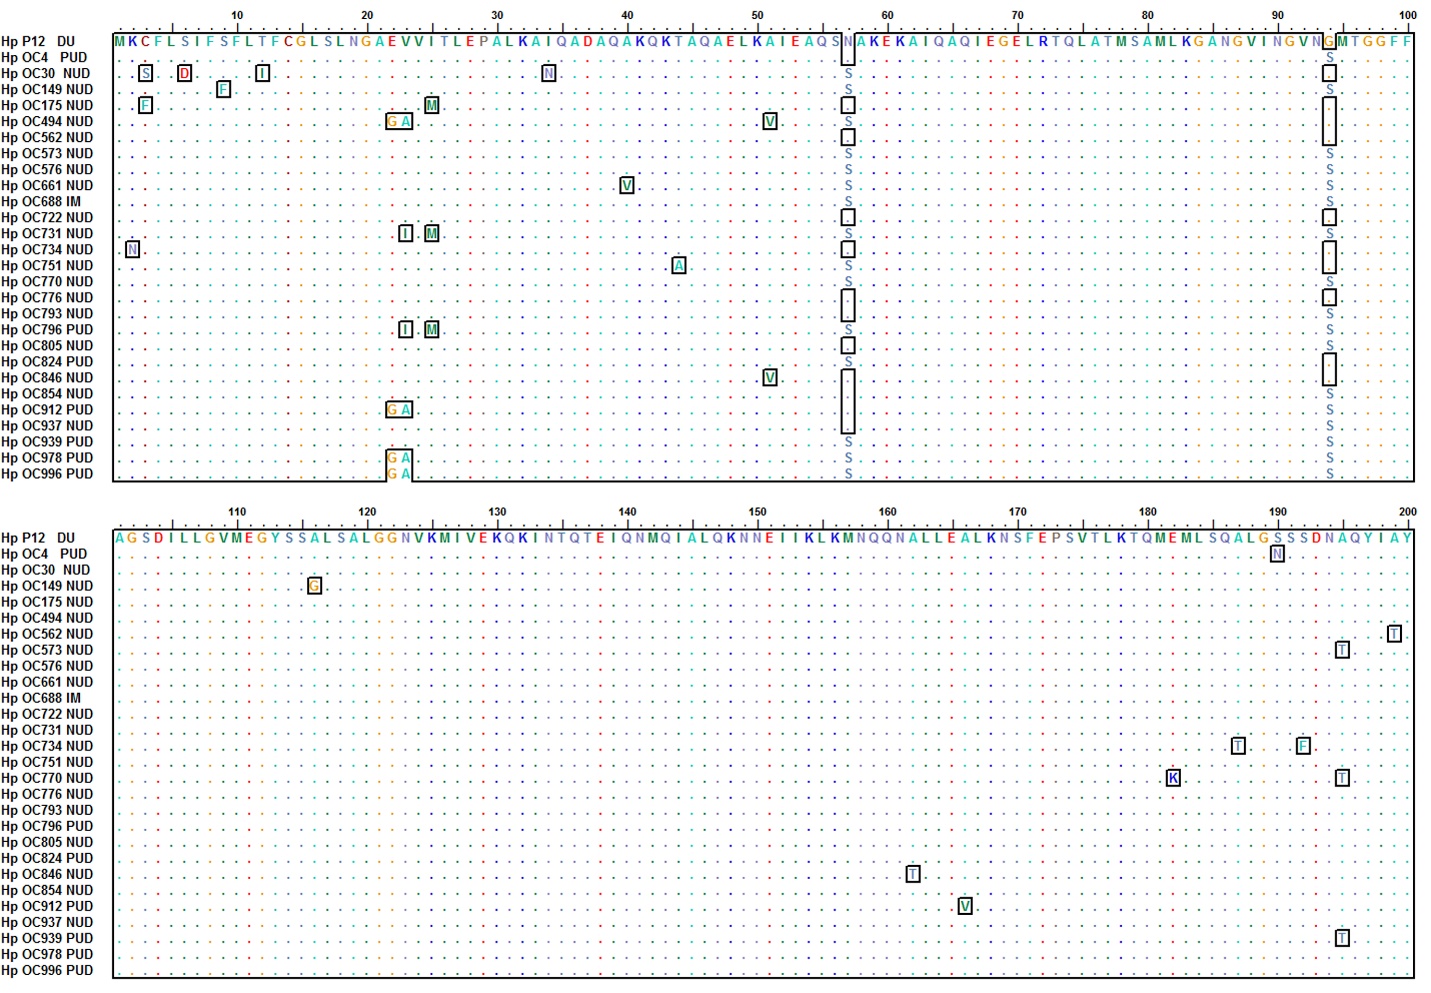


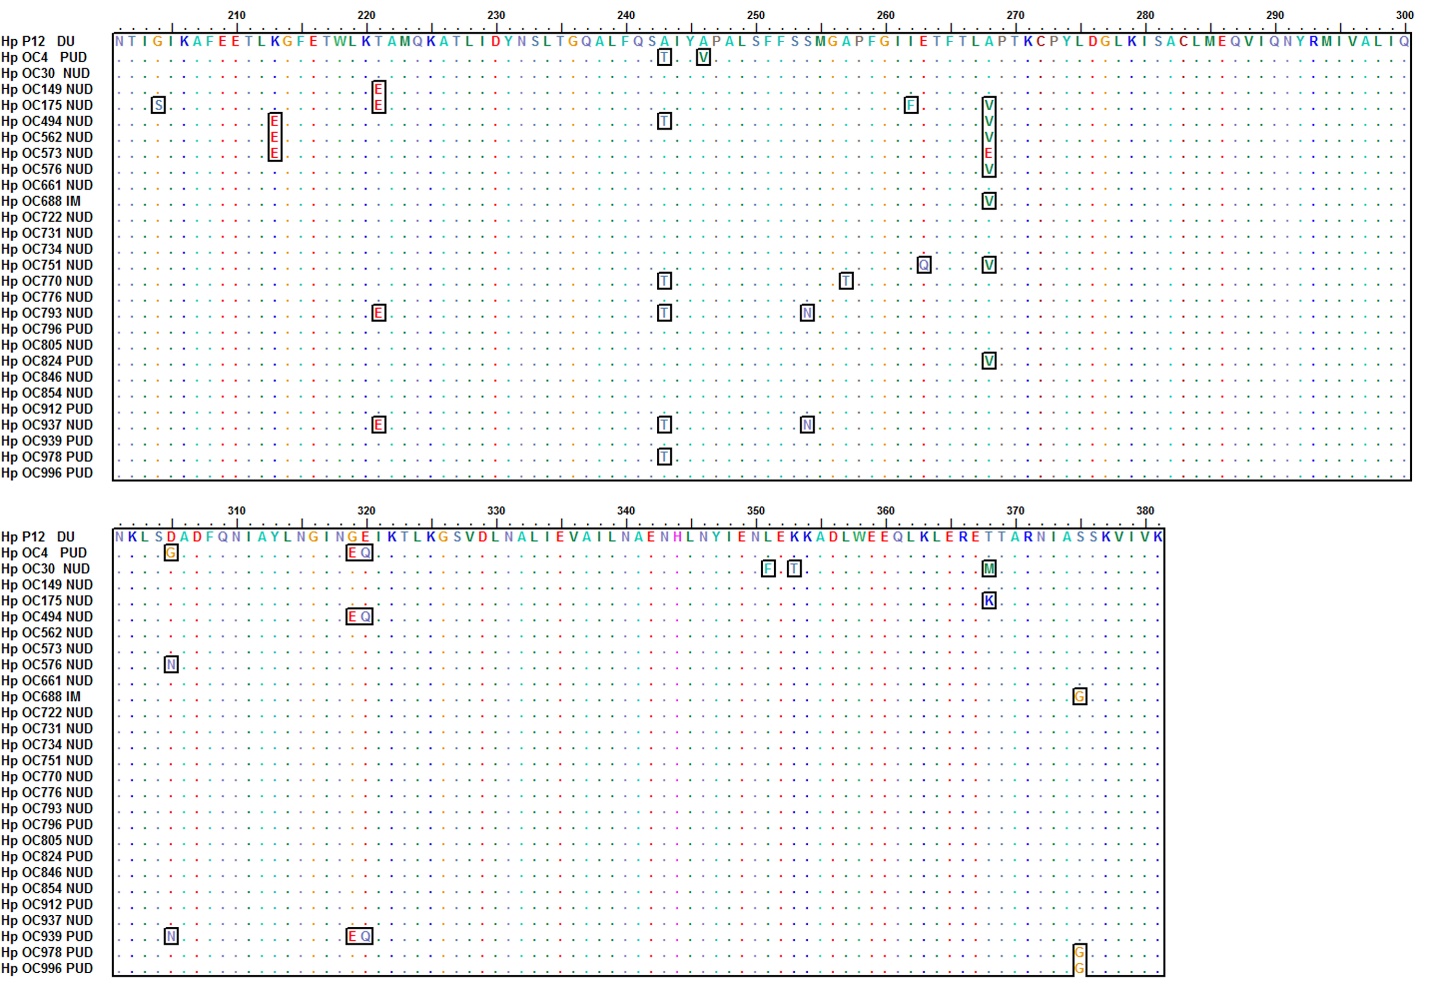


**Figure S1.** Complete alignment of CagI sequences among *H. pylori* strains (*n*=27) from patients with different clinical status. The amino acid sequences were compared with the CagI sequences of *H. pylori* strain P12 (is shown on the top line), as a reference strain. The variable and infrequent amino acid residues are surrounded by black borders. Notably, the C-terminal hexapeptide motif consisting of the SKVIVK sequence were highly conserved among the strains.


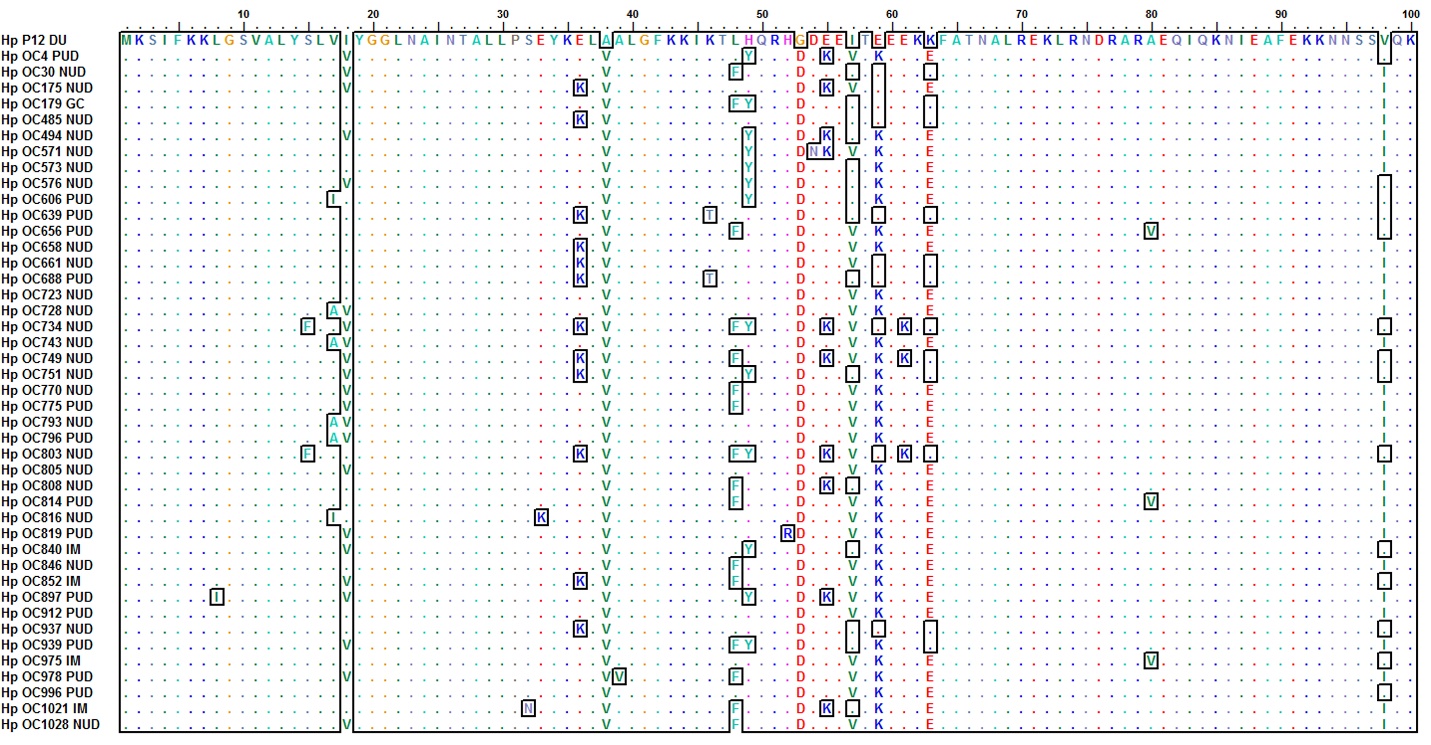

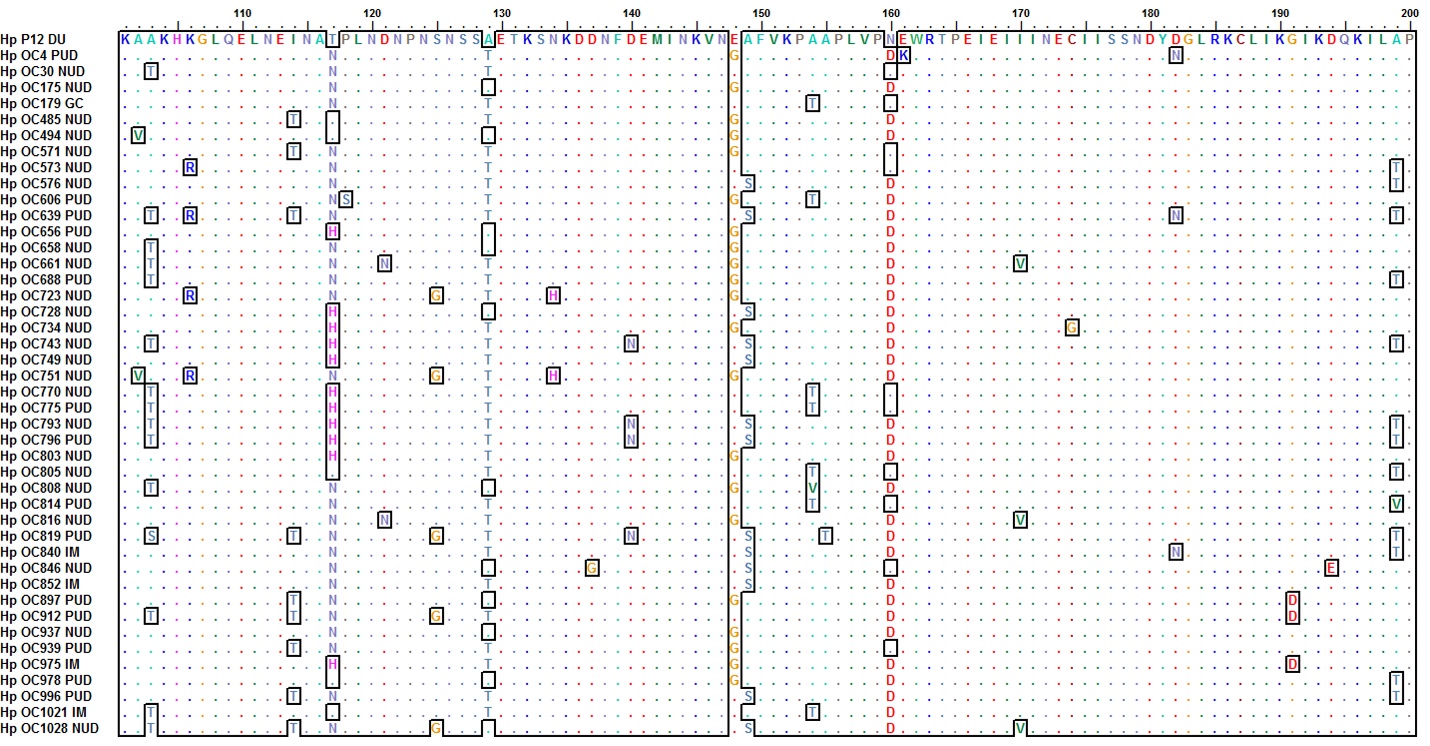

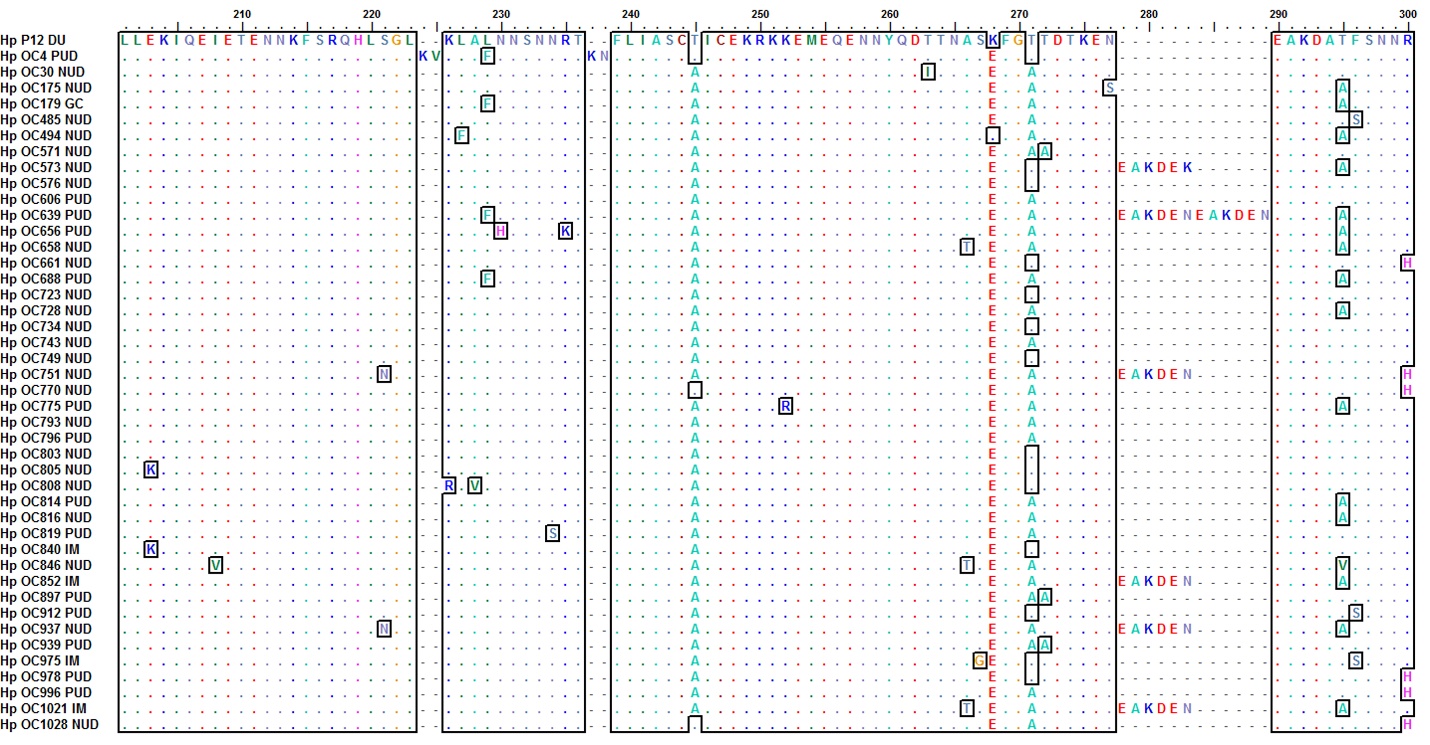

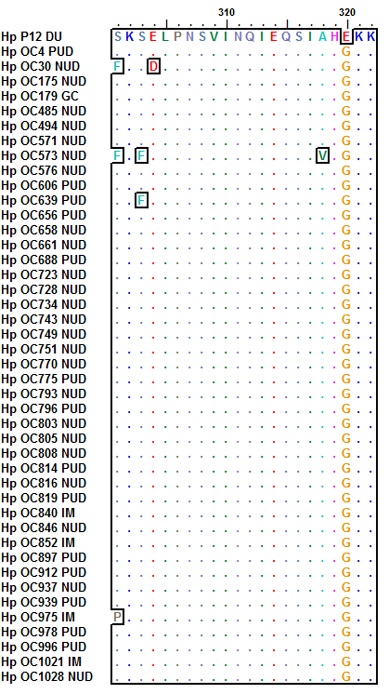


**CagNHM**

**Hexapeptide motif**

**Figure S2.** Complete alignment of CagN sequences among 43 *H. pylori* strains from patients with different clinical status. The amino acid sequences were compared with the CagN sequences of *H. pylori* strain P12 (is shown on the top line), as a reference strain. The variable and infrequent amino acid residues are surrounded by black borders. Notably, the CagN hypervariable motif (CagNHM) and the hypothetical hexapeptide motif (EAKDEN/K) are indicated at residues 53-63 and 278-283, respectively.
